# Supplementary material for: Secondary injury to distal regions after intracerebral hemorrhage influence neurological functional outcome
Source: PubMed Central journal article supplement (PMC7093199; doi:10.18632/aging.102880), 2020-03-08
Supplement: aging-12-102880-s002..pdf [file aging-12-102880-s002..pdf]

## SUPPLEMENTARY TABLES

**Supplementary Table 1. Brain areas of decreased FA value among ICH patients compared to healthy control at 1st week.**

|          | Structure                 | Voxels | Peak intensity | Peak MNI coordinate |     |    |
|----------|---------------------------|--------|----------------|---------------------|-----|----|
|          |                           |        |                | X                   | Y   | Z  |
|          | Total                     | 2534   |                |                     |     |    |
|          | Right Cerebrum            | 2516   |                |                     |     |    |
|          | White Matter              | 2005   |                |                     |     |    |
|          | Gray Matter               | 457    |                |                     |     |    |
|          | Temporal Lobe             | 456    |                |                     |     |    |
|          | Frontal Lobe              | 298    |                |                     |     |    |
|          | Superior Temporal Gyrus   | 215    |                |                     |     |    |
|          | Lentiform Nucleus         | 213    |                |                     |     |    |
|          | Insula                    | 209    |                |                     |     |    |
|          | Temporal_Sup_R (aal)      | 194    |                |                     |     |    |
|          | Putamen_R (aal)           | 187    |                |                     |     |    |
|          | brodmann area 13          | 93     |                |                     |     |    |
|          | brodmann area 41          | 90     |                |                     |     |    |
| Cluster1 | Caudate_R (aal)           | 90     | 8.5932         | 24                  | -24 | 22 |
|          | Hippocampus_R (aal)       | 83     |                |                     |     |    |
|          | Parietal Lobe             | 82     |                |                     |     |    |
|          | Thalamus_R (aal)          | 69     |                |                     |     |    |
|          | Transverse Temporal Gyrus | 48     |                |                     |     |    |
|          | Pallidum_R (aal)          | 25     |                |                     |     |    |
|          | Inferior Parietal Lobule  | 25     |                |                     |     |    |
|          | Medial Globus Pallidus    | 24     |                |                     |     |    |
|          | Midbrain                  | 24     |                |                     |     |    |
|          | Clastrum                  | 23     |                |                     |     |    |
|          | Rolandic_Oper_R (aal)     | 22     |                |                     |     |    |
|          | Right Brainstem           | 18     |                |                     |     |    |
|          | Amygdala_R (aal)          | 15     |                |                     |     |    |
|          | Precuneus_R (aal)         | 15     |                |                     |     |    |
|          | Total                     | 418    |                |                     |     |    |
|          | Left Cerebrum             | 418    |                |                     |     |    |
|          | White Matter              | 338    |                |                     |     |    |
|          | Gray Matter               | 80     |                |                     |     |    |
|          | Putamen_L (aal)           | 68     |                |                     |     |    |
| Cluster2 | Lentiform Nucleus         | 67     | 5.4448         | -20                 | 18  | 4  |
|          | Sub-Gyral                 | 36     |                |                     |     |    |
|          | Frontal Lobe              | 36     |                |                     |     |    |
|          | Caudate_L (aal)           | 31     |                |                     |     |    |
|          | Thalamus_L (aal)          | 26     |                |                     |     |    |
|          | Thalamus                  | 13     |                |                     |     |    |

**Supplementary Table 2. Brain areas of decreased FA value among ICH patients compared to healthy control at 12 week.**

|          | Structure               | Voxels | Peak intensity | Peak MNI coordinate |     |    |
|----------|-------------------------|--------|----------------|---------------------|-----|----|
|          |                         |        |                | X                   | Y   | Z  |
| Cluster1 | Total                   | 154    | 4.3403         | 24                  | 20  | -8 |
|          | Right Cerebrum          | 154    |                |                     |     |    |
|          | White Matte             | 132    |                |                     |     |    |
|          | Putamen_R (aal)         | 115    |                |                     |     |    |
|          | Gray Matter             | 22     |                |                     |     |    |
|          | Clastrum                | 19     |                |                     |     |    |
|          | Frontal Lobe            | 8      |                |                     |     |    |
|          | Sub-Gyral               | 7      |                |                     |     |    |
|          | Lentiform Nucleus       | 2      |                |                     |     |    |
| Cluster2 | TOTAL                   | 313    | 4.527          | 32                  | -18 | 10 |
|          | Right Cerebrum          | 313    |                |                     |     |    |
|          | White Matter            | 196    |                |                     |     |    |
|          | Gray Matter             | 111    |                |                     |     |    |
|          | Lentiform Nucleus       | 83     |                |                     |     |    |
|          | Insula_R (aal)          | 29     |                |                     |     |    |
|          | Clastrum                | 26     |                |                     |     |    |
|          | Hippocampus_R (aal)     | 17     |                |                     |     |    |
|          | Lateral Globus Pallidus | 15     |                |                     |     |    |
|          | Temporal Lobe           | 12     |                |                     |     |    |
|          | Sub-Gyral               | 11     |                |                     |     |    |
|          | Thalamus_R (aal)        | 10     |                |                     |     |    |
|          | Midbrain                | 2      |                |                     |     |    |

**Supplementary Table 3. Brain areas of increased FA value at 12th week compared with 1st week among ICH patients.**

|                  | Structure               | Voxels | Peak intensity | Peak MNI coordinate |     |    |
|------------------|-------------------------|--------|----------------|---------------------|-----|----|
|                  |                         |        |                | X                   | Y   | Z  |
| Cluster1         | Total                   | 429    | 3.6641         | -36                 | -46 | 8  |
|                  | Left Cerebrum           | 429    |                |                     |     |    |
|                  | White Matter            | 339    |                |                     |     |    |
|                  | Sub-Gyral               | 291    |                |                     |     |    |
|                  | Temporal Lobe           | 277    |                |                     |     |    |
|                  | Parahippocampa Gyrus    | 34     |                |                     |     |    |
|                  | Temporal_Inf_L (aal)    | 33     |                |                     |     |    |
|                  | Hippocampus_L (aal)     | 31     |                |                     |     |    |
|                  | Gray Matter             | 25     |                |                     |     |    |
|                  | Occipital Lobe          | 20     |                |                     |     |    |
| Cluster2         | TOTAL                   | 315    | 4.2843         | 20                  | 20  | 4  |
|                  | Right Cerebrum          | 315    |                |                     |     |    |
|                  | White Matter            | 293    |                |                     |     |    |
|                  | Frontal Lobe            | 121    |                |                     |     |    |
|                  | Sub-Gyral               | 111    |                |                     |     |    |
|                  | Caudate_R (aal)         | 101    |                |                     |     |    |
|                  | Putamen_R (aal)         | 45     |                |                     |     |    |
|                  | Gray Matter             | 21     |                |                     |     |    |
| Cluster3         | TOTAL                   | 416    | 4.1084         | 24                  | -32 | 24 |
|                  | Right Cerebrum          | 416    |                |                     |     |    |
|                  | White Matter            | 364    |                |                     |     |    |
|                  | Sub-lobar               | 213    |                |                     |     |    |
|                  | Extra-Nuclear           | 161    |                |                     |     |    |
|                  | Sub-Gyral               | 156    |                |                     |     |    |
|                  | Temporal Lobe           | 143    |                |                     |     |    |
|                  | Gray Matter             | 49     |                |                     |     |    |
|                  | Insula                  | 49     |                |                     |     |    |
|                  | Parietal Lobe           | 28     |                |                     |     |    |
| Cluster4         | Hippocampus_R (aal)     | 6      |                |                     |     |    |
|                  | TOTAL                   | 257    | 3.8768         | 22                  | -16 | 0  |
|                  | Right Cerebrum          | 255    |                |                     |     |    |
|                  | Lentiform Nucleus       | 179    |                |                     |     |    |
|                  | Gray Matter             | 179    |                |                     |     |    |
|                  | Lateral Globus Pallidus | 93     |                |                     |     |    |
|                  | White Matter            | 76     |                |                     |     |    |
|                  | Thalamus_R (aal)        | 41     |                |                     |     |    |
|                  | Putamen_R (aal)         | 11     |                |                     |     |    |
|                  | Midbrain                | 5      |                |                     |     |    |
| Cluster5         | Right Brainstem         | 2      |                |                     |     |    |
|                  | TOTAL                   | 165    | 3.7888         | 26                  | -56 | -6 |
|                  | Right Cerebrum          | 163    |                |                     |     |    |
|                  | White Matter            | 135    |                |                     |     |    |
|                  | Occipital Lobe          | 132    |                |                     |     |    |
|                  | Lingual_R (aal)         | 91     |                |                     |     |    |
|                  | Sub-Gyral               | 68     |                |                     |     |    |
| Fusiform_R (aal) | 29                      |        |                |                     |     |    |

|          |                  |     |        |    |    |    |
|----------|------------------|-----|--------|----|----|----|
| Cluster6 | Gray Matter      | 27  |        |    |    |    |
|          | brodmann area 19 | 26  |        |    |    |    |
|          | Temporal Lobe    | 19  |        |    |    |    |
|          | TOTAL            | 125 | 3.7124 | 38 | -4 | 20 |
|          | Right Cerebrum   | 125 |        |    |    |    |
|          | White Matter     | 84  |        |    |    |    |
|          | Insula           | 74  |        |    |    |    |
|          | Gray Matter      | 38  |        |    |    |    |

**Supplementary Table 4. Brain areas of decreased FA value at 12th week compared with 1st week among ICH patients.**

|          | Structure            | Voxels | Peak intensity | Peak MNI coordinate |     |    |
|----------|----------------------|--------|----------------|---------------------|-----|----|
|          |                      |        |                | X                   | Y   | Z  |
| Cluster1 | TOTAL                | 115    | -4.5354        | 22                  | -34 | 0  |
|          | Right Cerebrum       | 107    |                |                     |     |    |
|          | Hippocampus_R (aal)  | 68     |                |                     |     |    |
|          | White Matter         | 54     |                |                     |     |    |
|          | Gray Matter          | 45     |                |                     |     |    |
|          | Parahippocampa Gyrus | 29     |                |                     |     |    |
|          | Thalamus             | 29     |                |                     |     |    |
|          | Temporal Lobe        | 15     |                |                     |     |    |
| Cluster2 | TOTAL                | 129    | -3.7471        | 16                  | -58 | 12 |
|          | Right Cerebrum       | 127    |                |                     |     |    |
|          | Limbic Lobe          | 115    |                |                     |     |    |
|          | Posterior Cingulate  | 108    |                |                     |     |    |
|          | White Matter         | 95     |                |                     |     |    |
|          | Precuneus_R (aal)    | 57     |                |                     |     |    |
|          | Lingual_R (aal)      | 36     |                |                     |     |    |
|          | Calcarine_R (aal)    | 34     |                |                     |     |    |
|          | Gray Matter          | 28     |                |                     |     |    |
|          | brodmann area 29     | 14     |                |                     |     |    |
