# Supplementary material for: Secondary injury to distal regions after intracerebral hemorrhage influence neurological functional outcome
Source: publisher site journal article supplement (doi:10.18632/aging.102880), 2020-03-08
Supplement: Supplementary file [file aging-v12i5-102880-supplementary-material-SD1.pdf]

## SUPPLEMENTARY FIGURE

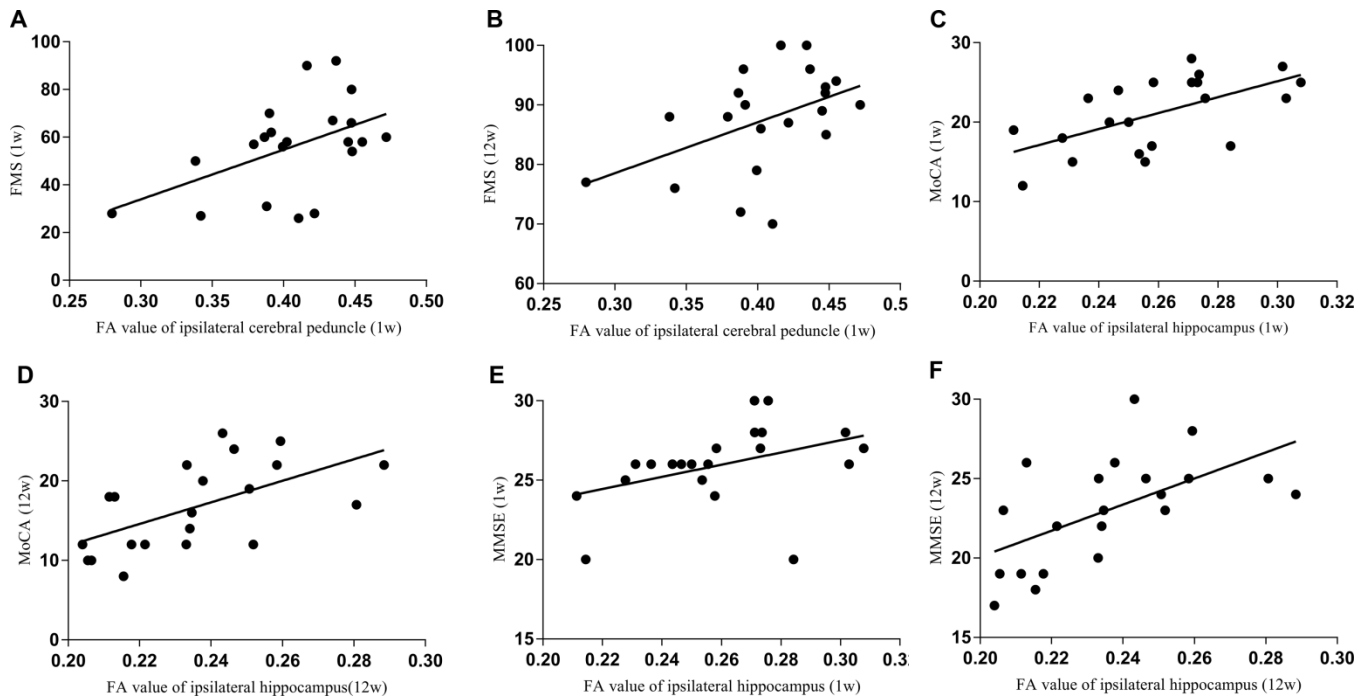

**Supplementary Figure 1. Association between FA value and neurological functional outcome.** (A) Association of patients' ipsilateral cerebral peduncle FA value at 1st w was associated with FMS at 1st w. (B) Association of patients' ipsilateral cerebral peduncle FA value at 1st w was associated with FMS at 12th w. (C) Association of patients' ipsilateral hippocampus FA value at 1st w was associated with MoCA at 1st w. (D) Association of patients' ipsilateral hippocampus FA value at 12th w was associated with MoCA at 12th w. (E) Association of patients' ipsilateral hippocampus FA value at 1st w was associated with MMSE at 1st w. (F) Association of patients' ipsilateral hippocampus FA value at 12th w was associated with MMSE 12th w.
